# Supplementary material for: Electronic structure of AlFeN films exhibiting crystallographic orientation change from c- to a-axis with Fe concentrations and annealing effect
Source: PubMed Central journal article supplement (PMC7000734; doi:10.1038/s41598-020-58835-5), 2020-02-04
Supplement: 41598_2020_58835_MOESM1_ESM.pdf [file 41598_2020_58835_MOESM1_ESM.pdf]

**Electronic structure of AlFeN films exhibiting crystallographic orientation change from *c*- to *a*-axis with Fe concentrations and annealing effect**

Nobuyuki Tatemizo<sup>1\*</sup>, Saki Imada<sup>1\*</sup>, Kizuna Okahara<sup>1</sup>, Haruki Nishikawa<sup>1</sup>, Kazuki Tsuruta<sup>2</sup>, Toshiaki Ina<sup>2</sup>, Yoshio Miura<sup>3</sup>, Koji Nishio<sup>1</sup>, and Toshiyuki Isshiki<sup>1</sup>

<sup>1</sup>Faculty of Electrical Engineering and Electronics, Kyoto Institute of Technology, Kyoto, Kyoto 606-8585, Japan

<sup>2</sup> Japan Synchrotron Radiation Research Institute, Sayo, Hyogo 679-5198, Japan

<sup>3</sup> Research Center for Magnetic and Spintronic Materials, National Institute for Materials Science, Tsukuba, Ibaraki 305-0047, Japan

\*e-mail: n-tatemizo@kit.ac.jp, saki\_imada@kit.ac.jp

## Supplemental:

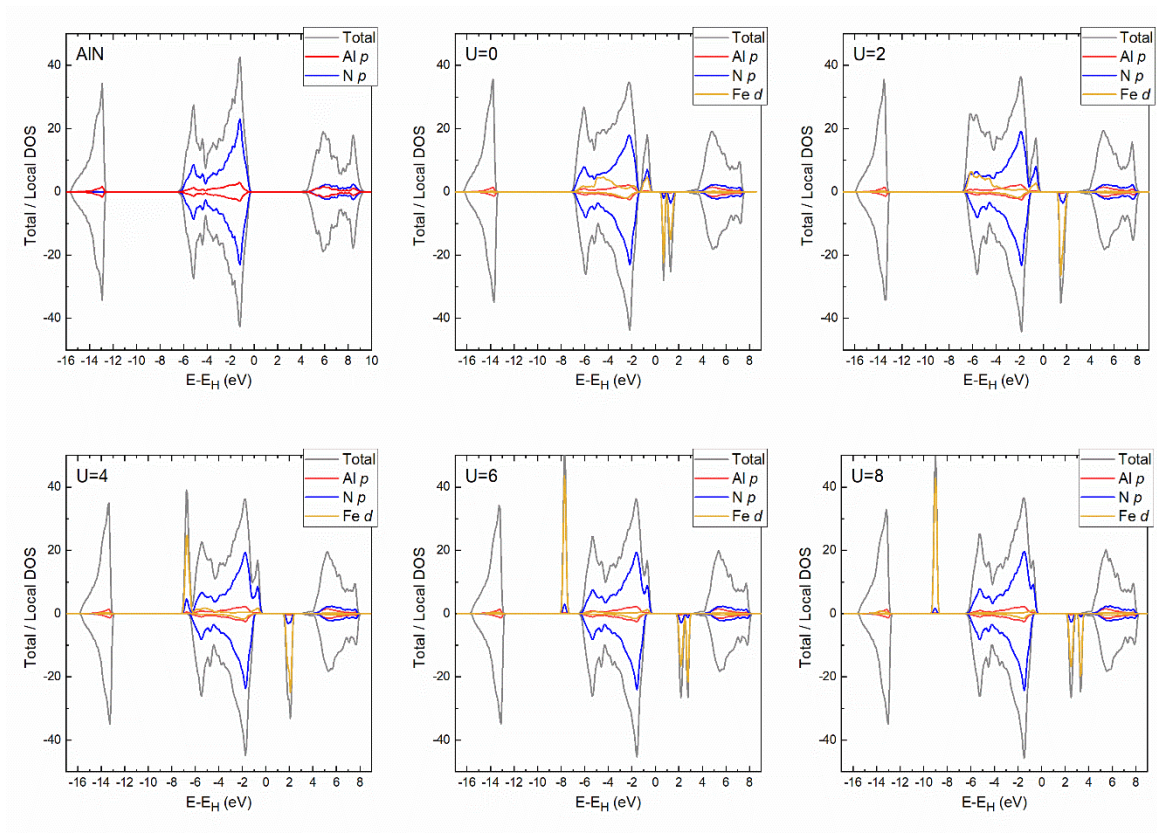

**Fig. S1**

Figures S1a-S1f show the calculated band structures using the VASP code for  $\text{Al}_{33}\text{Fe}_3\text{N}_{36}$  for various Hubbard corrections ( $U$ ) for Fe from  $U = 0$ – $8$ . The zeros in each energy axis ( $E-E_H$ ) are the highest occupied states by the electrons at ground state. In the N- $p$  PDOS for  $U = 4, 6,$  and  $8$ , a peak appeared just under the main component of VB between  $0$  and  $-6$  eV. Because there was no corresponding peak in the XES, we chose  $U = 2$  for Fig. 2f. To determine the Hubbard corrections ( $U$ ) for Fe as well as Al and N, other experiments such as Fe  $L$ -edge XANES and XES include resonant XES and Al  $K$ -edge XES.
